# Supplementary material for: Dose–Volume Constraints fOr oRganS At risk In Radiotherapy (CORSAIR): An “All-in-One” Multicenter–Multidisciplinary Practical Summary
Source: MDPI journal article supplement (doi:10.3390/curroncol29100552), 2022-09-27
Supplement: s1 [file s1]

## Supplementary Material

**Table S1.** Specific dose-volume constraints for Emerging OaRs.

| Organ                     | Imaging Technique | Constraints (Conventional Fractionation)* (3)                                                                                                                                                                                                                                                                   |
|---------------------------|-------------------|-----------------------------------------------------------------------------------------------------------------------------------------------------------------------------------------------------------------------------------------------------------------------------------------------------------------|
| Aorta                     |                   | $D_{MAX(1\text{ cm}^3)} < 74\text{ Gy}$ [99] [C]                                                                                                                                                                                                                                                                |
| Bichat Fat Pad            |                   | No organ Volume reduction with Dmax<br>70 Gy<br>[100] [D]                                                                                                                                                                                                                                                       |
| Bone Marrow               |                   | BM- $V_{10\text{Gy}} < 90\%$ [68] [C];<br>BM- $V_{20\text{Gy}} < 84\%$ [101] [C];<br>BM- $D_{MEAN} < 25\text{ Gy}$ (optimal);<br>BM- $D_{MEAN} < 30\text{ Gy}$ (mandatory) [102][C];<br>LSS- $V_{10\text{Gy}} < 85\%$ ;<br>LSS- $D_{MEAN} < 28\text{ Gy}$ [102] [C];<br>LSS- $V_{15\text{Gy}} < 85\%$ [101] [C] |
| Femur                     |                   | $D_{MAX} < 60\text{ Gy}$ mandatory<br>$D_{MAX} < 50\text{ Gy}$ optimal<br>[103,104] [C]                                                                                                                                                                                                                         |
| Hypothalamus              | T1-weighted MRI   | $D_{MAX} < 50\text{ Gy}$ [105] [C]                                                                                                                                                                                                                                                                              |
| Temporo-mandibular -joint |                   | $D_{MAX(0.1\text{ cm}^3)} < 70\text{ Gy}$ [35] [A]                                                                                                                                                                                                                                                              |
| Vagina                    |                   | $D_{2\text{cm}^3} \leq 145\text{ Gy}$ EQD2 (EBRT +BRT) [106] [C]<br>$D_{rectovaginal\text{point}} \leq 65\text{ Gy}$ EQD2 (EBRT +BRT) [107]<br>[C] †                                                                                                                                                            |

**Legend:** BM: Bone marrow; BRT brachytherapy; DMax: Maximum Dose; DMean: Mean Dose; EBRT: External Beam Radiation Therapy, EQD2: Equivalent dose in 2-Gy fractions; Gy: Gray; LSS: Lumbosacral Spine; OAR: Organ at Risk; The anatomical descriptions are reported in Table 2. Common abbreviations were used in the tables:  $V_{\odot}$  = Volume receiving a dose  $\geq \odot\text{ Gy}$ ,  $D_{\odot\odot}$  = dose received by % of the organ volume,  $D_{\odot}$  = dose received by  $\gamma\text{ cm}^3$  (the cubic centimeters) of the organ volume, DMAX = maximum dose received by the organ, DMEAN = mean dose received by the organ. Volumes and doses were expressed as percentage (%) or absolute values (cm<sup>3</sup> or Gy, respectively). The letters in square brackets indicate the levels of evidence, classified as follows: [A] International guidelines; [B] literature review on clinical or planning studies; [C] Data from results of clinical or planning studies; [D] expert opinions or used in prospective trials. \*considered 180-200 cGy/fraction, as defined by Marks et al (3); †Dose to the recto-vaginal point, defined in the referred text. [106].

**Table S2.** Specific dose-volume constraints for adult patients treated with curative radiotherapy for Hodgkin Lymphoma.

| Organ                           | Constraints (conventional fractionation) (3)                                                                                                                                                                                                                   |
|---------------------------------|----------------------------------------------------------------------------------------------------------------------------------------------------------------------------------------------------------------------------------------------------------------|
| Aortic valve                    | $D_{MAX} < 25 \text{ Gy}$ [11] [A]                                                                                                                                                                                                                             |
| Bone Marrow                     | $V_{5Gy}$ : ALARA;<br>$V_{10Gy} < 50\%$ ;<br>$V_{25Gy} < 25\%$ [11] [A]                                                                                                                                                                                        |
| Bowel Small                     | $D_{MAX} < 45Gy$ ;<br>$V_{15Gy} < 120 \text{ cm}^3$ [11] [A]                                                                                                                                                                                                   |
| Breast                          | $D_{MEAN} < 4$ (optimal) ;<br>$D_{MEAN} < 4\text{-}15 \text{ Gy}$ (acceptable);<br>$V_{4Gy} < 10\%$ (optimal);<br>$V_{4Gy} : 10\%\text{-}20\%$ (acceptable);<br>$V_{10Gy} < 10\%$ (acceptable) [108] [A]                                                       |
| Coronary vessels                | Avoid hotspots [11] [A]                                                                                                                                                                                                                                        |
| Heart                           | $D_{MEAN} < 8 \text{ Gy}$ (recommended) ;<br>$D_{MEAN} < 15 \text{ Gy}$ (acceptable) [11] [A];                                                                                                                                                                 |
| Kidney                          | $D_{MEAN} < 8 \text{ Gy}$ ;<br>$V_{10Gy} < 30\%$ ;<br>$V_{20Gy} < 15\%$ (recommended) ;<br>$V_{20Gy} < 25\%$ (acceptable) [11] [A]                                                                                                                             |
| Lacrimal Gland                  | $V_{20Gy} < 80\%$ [11] [A]                                                                                                                                                                                                                                     |
| Left ventricle                  | $D_{MEAN} < 8 \text{ Gy}$ (recommended) ;<br>$D_{MEAN} < 15 \text{ Gy}$ (acceptable) [11] [A];                                                                                                                                                                 |
| Liver                           | $D_{MEAN} < 15 \text{ Gy}$ ;<br>$V_{20Gy} < 30\%$ ;<br>$V_{30Gy} < 20\%$ [11] [A]                                                                                                                                                                              |
| Lung                            | $V_{5Gy} < 35\%$ (optimal);<br>$V_{5Gy} : 35\%\text{-}45\%$ (acceptable);<br>$V_{20Gy} < 20\%$ (optimal);<br>$V_{20Gy} : 20\%\text{-}28\%$ (acceptable);<br>$D_{MEAN} < 8 \text{ Gy}$ (optimal);<br>$D_{MEAN} < 8\text{-}12 \text{ Gy}$ (acceptable) [108] [A] |
| Mitral valve                    | $D_{MAX} < 25 \text{ Gy}$ [11] [A]                                                                                                                                                                                                                             |
| Pancreas                        | Minimize Volume $> 36 \text{ Gy}$ [11] [A]                                                                                                                                                                                                                     |
| Parotid Gland                   | Ipsilateral: $D_{MEAN} < 11 \text{ Gy}$ (recommended);<br>$D_{MEAN} < 24 \text{ Gy}$ (acceptable);<br>Controlateral: ALARA[11] [A]                                                                                                                             |
| Pericardium                     | $D_{100cm^3} < 5 \text{ Gy}$<br>[11] [A]                                                                                                                                                                                                                       |
| Pharyngeal Constrictors Muscles | $D_{MEAN} < 25 \text{ Gy}$ [11] [A]                                                                                                                                                                                                                            |
| Pulmonary valve                 | $D_{MAX} < 30 \text{ Gy}$ [11] [A];                                                                                                                                                                                                                            |
| Oral Cavity                     | $D_{MEAN} < 11 \text{ Gy}$ [11] [A]                                                                                                                                                                                                                            |
| Spleen                          | $D_{MEAN} < 10 \text{ Gy}$ ;<br>$V_{5Gy} \leq 30\%$ ;<br>$V_{15Gy} \leq 20\%$ [11] [A]                                                                                                                                                                         |

|                     |                                                                                                                                  |
|---------------------|----------------------------------------------------------------------------------------------------------------------------------|
| Stomach             | $D_{MAX} < 45\text{Gy}$ [11] [A]                                                                                                 |
| Submandibular Gland | Ipsilateral: $D_{MEAN} < 11\text{ Gy}$ (recommended);<br>$D_{MEAN} < 24\text{ Gy}$ (acceptable);<br>Controlateral: ALARA[11] [A] |
| Thyroid Gland       | $V_{25\text{ Gy}} < 63.5\%$ ;<br>Minimize V30 [11] [A]                                                                           |
| Tricuspid valve     | $D_{MAX} < 30\text{ Gy}$ [11] [A]                                                                                                |

**Legend:** A\_LAD: Left Anterior Descending Artery; ALARA: “as low as reasonably achievable”, principle of radiation safety; CxCA: Circumflex Coronary Artery; DMax: Maximum Dose; DMean: Mean Dose; Gy: Gray; LMCA: Left Main Coronary Artery, PDA: Posterior Descending Artery; RCA: Right Coronary Artery. Common abbreviations were used in the tables:  $V_{\odot}$  = Volume receiving a dose  $\geq \odot$  Gy,  $D_{\odot\odot}$  = dose received by % of the organ volume,  $D_{\odot}$  = dose received by  $\gamma$  cm<sup>3</sup> (the cubic centimeters) of the organ volume, DMAX = maximum dose received by the organ, DMEAN = mean dose received by the organ. Volumes and doses were ex-pressed as percentage (%) or absolute values (cm<sup>3</sup> or Gy, respectively). The anatomical descriptions are described in Table 2. The letters in square brackets indicate the levels of evidence, classified as follows: [A] International guidelines; [B] literature review on clinical or planning studies; [C] Data from results of clinical or planning studies; [D] expert opinions or used in prospective trials. \*considered 180-200 cGy/fraction, as defined by Marks et al [3].

**Table S3.** Specific dose-volume constraints for adult patients treated with curative radiotherapy for Breast Cancer.

| Organ                             | Moderate Hypofractionation<br>(40 Gy/15 fx)                                                                                                                                                                                                                                                                                                                                                                                                                                                             | Ultra- Hypofractionation<br>(5 Fractions)                                                                                                                   |
|-----------------------------------|---------------------------------------------------------------------------------------------------------------------------------------------------------------------------------------------------------------------------------------------------------------------------------------------------------------------------------------------------------------------------------------------------------------------------------------------------------------------------------------------------------|-------------------------------------------------------------------------------------------------------------------------------------------------------------|
| Anterior<br>Descend-ing<br>Artery | D <sub>MAX</sub> ( ≤ 20 Gy)<br>[109,110][C]                                                                                                                                                                                                                                                                                                                                                                                                                                                             |                                                                                                                                                             |
| Breast                            | D <sub>MEAN</sub> ALARA;<br>D <sub>MAX</sub> < 3% of the prescribed dose<br>[111] [D]<br>V <sub>5Gy</sub> < 15%<br>[112,113] [D]                                                                                                                                                                                                                                                                                                                                                                        | Contralateral breast<br>D <sub>MAX</sub> <1 Gy [13] [D] †                                                                                                   |
| Heart                             | V <sub>40Gy</sub> < 3%;<br>V <sub>18Gy</sub> < 5% [114] [D];<br>V <sub>10Gy</sub> < 5%;<br>V <sub>2Gy</sub> < 30%; [14] [D];<br>If DIBH :<br>V <sub>13Gy</sub> < 10%;<br>V <sub>13Gy</sub> < 2% (optimal);<br>D <sub>MEAN</sub> < 3 Gy [115] [D]                                                                                                                                                                                                                                                        | V <sub>3Gy</sub> < 10% [13] [D] †;<br>V <sub>1.5Gy</sub> < 30%;<br>V <sub>7Gy</sub> < 5 % [14] [D];                                                         |
| Lung                              | D <sub>MEAN</sub> <10 Gy;<br>V <sub>20Gy</sub> < 10% [114] [D];<br>V <sub>12Gy</sub> < 15% [14] [D];<br>V <sub>25Gy</sub> < 5%;<br>V <sub>17Gy</sub> < 8%;<br>V <sub>8Gy</sub> < 10%<br>D <sub>MEAN</sub> < 6.36 Gy<br>Contralateral lung V <sub>2.5Gy</sub> < 15% [111] [D];<br>If DIBH :<br>Ipsilateral lung :<br>V <sub>18Gy</sub> <10% (optimal);<br>D <sub>MEAN</sub> <6 Gy (optimal);<br>Contralateral lung :<br>V <sub>2.5Gy</sub> <3% (optimal);<br>D <sub>MEAN</sub> <1 Gy (optimal) [115] [D] | Ipsilateral lung :<br>V <sub>10Gy</sub> <20% [13] [D] †;<br>V <sub>8Gy</sub> <15% [14] [D];<br><br>Contralateral lung :<br>V <sub>5Gy</sub> <10% [13] [D] † |

**Legend:** ALARA: as low as reasonably achievable; DIBH: Deep inspiration breath hold; D<sub>Max</sub>: Maximum Dose; D<sub>Mean</sub>: Mean Dose; Gy: Gray. Consider the anatomical descriptions reported in Table2. Common abbreviations were used in the tables: V<sub>●</sub> = Volume receiving a dose ≥ ● Gy, D<sub>●●</sub> = dose received by % of the organ volume, D<sub>●</sub> = dose received by γ cm<sup>3</sup> (the cubic centimeters) of the organ volume, D<sub>MAX</sub> = maximum dose received by the organ, D<sub>MEAN</sub> = mean dose received by the organ. Volumes and doses were ex-pressed as percentage (%) or absolute values (cm<sup>3</sup> or Gy, respectively). The letters in square brackets indicate the levels of evidence, classified as follows: [A] International guidelines; [B] literature review on clinical or planning studies; [C] Data from results of clinical or planning studies; [D] expert opinions or used in prospective trials. \*anatomical description reported in **Table1**; † only for Partial Breast Irradiation.

**Table S4.** Specific dose-volume constraints for pediatric patients.

| Organ                            | Covetional Fractionation *(3)                                                                            | Comments                                                                                                                                                                                                                                                                                    |
|----------------------------------|----------------------------------------------------------------------------------------------------------|---------------------------------------------------------------------------------------------------------------------------------------------------------------------------------------------------------------------------------------------------------------------------------------------|
| Brain                            | D <sub>MAX</sub> 58-59 Gy [17] [B]                                                                       | 5% risk of brain necrosis for doses > 58-59 Gy; 5 % risk of neurocognitive function for doses > 35.7, 29.1, 22.2, 18.1 Gy if irradiated brain volume is 10, 20, 50, 100 %, respectively                                                                                                     |
| Brainstem                        | D <sub>MAX</sub> < 55.8 Gy-RBE<br>V <sub>55Gy</sub> ≤ 6% [116] [C]                                       |                                                                                                                                                                                                                                                                                             |
| Cochlea                          | D <sub>MEAN</sub> < 35 Gy [40] [B]                                                                       |                                                                                                                                                                                                                                                                                             |
| Hearth                           | D <sub>MEAN</sub> < 15 Gy [20] [A]<br>V <sub>20Gy</sub> < 0.1 %;<br>V <sub>5Gy</sub> < 50 % [117] [C]    |                                                                                                                                                                                                                                                                                             |
| Lung                             | V <sub>24Gy</sub> < 30% [20] [A]                                                                         |                                                                                                                                                                                                                                                                                             |
| Optic pathway                    | D <sub>MAX</sub> < 30 Gy (optimal);<br>[15] [D]<br>D <sub>MAX</sub> < 45 Gy (mandatory); [15,40] [B]     | Retinopaty, partial blindness, cataracts.                                                                                                                                                                                                                                                   |
| Orbital Bone                     | D <sub>MAX(0.1 cm3)</sub> < 40 Gy-RBE [118] [C]                                                          | To avoid dysmorphic alterations of the orbital bones (especially in the radiotherapy of rhabdomyosarcomas)                                                                                                                                                                                  |
| Pituitary Gland                  | D <sub>MAX</sub> < 60 Gy [15] [D];<br>D <sub>MAX</sub> < 42 Gy;<br>D <sub>MEAN</sub> < 25 Gy<br>[40] [B] |                                                                                                                                                                                                                                                                                             |
| Parotid Gland                    | D <sub>MEAN</sub> ≤ 26 Gy<br>D <sub>MEAN</sub> < 40 Gy (mandatory) [18] [B]                              |                                                                                                                                                                                                                                                                                             |
| Soft Tissues and Skeletal system | Limit V <sub>25Gy</sub> -V <sub>30Gy</sub> [20] [A]                                                      | Limit V <sub>25-30 Gy</sub> to reduce muscular hypoplasia.<br>Avoid substantial dose gradient (> 10-15 Gy) to the spine to limit asymmetric growing (kyphosis or scoliosis). [20] [A]                                                                                                       |
| Spleen                           | D <sub>MEAN</sub> < 10 Gy [119] [A] [120] [C]                                                            |                                                                                                                                                                                                                                                                                             |
| Submandibular Gland              | D <sub>MEAN</sub> ≤ 26 Gy [18] [B]                                                                       |                                                                                                                                                                                                                                                                                             |
| Rectum                           | D <sub>5cm3</sub> < 52 Gy EQD2 [121] [C]                                                                 | Data obtained in a population of pediatric patients with pelvic tumors undergoing pulsed brachytherapy ± external beam radiotherapy                                                                                                                                                         |
| Thyroid Gland                    | D <sub>MEAN</sub> < 30 Gy ;<br>D <sub>MEAN</sub> < 20 Gy (optimal);<br>[16] [B]                          | The predicted average risk of compensated (subclinical) hypothyroidism was 25% and 44% for thyroid doses of 20 and 30 Gy, respectively.<br>From that analysis, the expected rates of uncompensated hypothyroidism were 7% and 13% for thyroid doses of 20 and 30 Gy, respectively. [16] [B] |

**Legend:** ALARA: as low as reasonably achievable; EQD2: equivalent doses per 2-Gy fractions; DMax: Maximum Dose; DMean: Mean Dose; Gy: Gray; Gy-RBE: gray relative biological equivalents. Common abbreviations were used in the tables: V<sub>●</sub> = Volume receiving a dose ≥ ● Gy, D<sub>●●</sub> = dose received by % of the organ volume, D<sub>●</sub> = dose received by γ cm<sup>3</sup> (the cubic centimeters) of the organ volume, D<sub>MAX</sub> = maximum dose received by the organ, D<sub>MEAN</sub> = mean dose received by the organ. Volumes and doses were ex-pressed as percentage (%) or absolute values (cm<sup>3</sup> or Gy, respectively). The anatomical descriptions are reported in Table 2. The letters in square brackets indicate the levels of evidence, classified as follows: [A] International guidelines; [B] literature review on clinical or planning studies; [C] Data from results of clinical or planning studies; [D] expert opinions or used in prospective trials. \*considered 180-200 cGy/fraction, as defined by Marks et al [3].

**Table S5.** Specific dose-volume constraints for adult patients treated for stereotactic arrhythmia radioablation (STAR).

| Organ                                        | Constraints for single dose hypofractionation                                                                                                                                                                                      |
|----------------------------------------------|------------------------------------------------------------------------------------------------------------------------------------------------------------------------------------------------------------------------------------|
| Anterior Descending Artery                   | $D_{MAX(0.03 \text{ cm}^3)} \leq 12 \text{ Gy}$ [24] [B]<br>$D_{MAX} \leq 14 \text{ Gy}$ [22] [D]                                                                                                                                  |
| Aorta                                        | $D_{MAX(0.1 \text{ cm}^3)} \leq 15.4 \text{ Gy}$ [6] [A];                                                                                                                                                                          |
| Bowel Small                                  | $D_{MAX(0.5 \text{ cm}^3)} < 15.4 \text{ Gy}$ (mandatory);<br>$D_{5\text{cm}^3} < 11.9 \text{ Gy}$ (optimal) [8] [A]                                                                                                               |
| Bowel Large                                  | $D_{MAX} < 18.4 \text{ Gy}$ (mandatory);<br>$D_{20\text{cm}^3} < 14.3 \text{ Gy}$ (optimal) [8] [A]                                                                                                                                |
| Chestwall                                    | $D_{MAX(0.1 \text{ cm}^3)} < 30 \text{ Gy}$ (optimal) [6] [A];<br>$D_{1\text{cm}^3} < 22 \text{ Gy}$<br>[8] [A]                                                                                                                    |
| Esophagus                                    | $D_{MAX(0.1 \text{ cm}^3)} \leq 15.4 \text{ Gy}$ [6] [A];<br>$V_{11.9\text{Gy}} < 5 \text{ cm}^3$ ;<br>$V_{16\text{Gy}} < 0.03 \text{ cm}^3$ [8,21] [A]                                                                            |
| Hearth- PTV                                  | $D_{MAX(0.1 \text{ cm}^3)} \leq 22 \text{ Gy}$ [6] [A];<br>$V_{16\text{Gy}} < 15 \text{ cm}^3$ ;<br>[8,21] [A] [23] [B]<br>$D_{50\%} \leq 5 \text{ Gy}$ [22] [D]                                                                   |
| Implantable Cardioverter Defibrillator (ICD) | $D_{MAX} \leq 0.5 \text{ Gy}$ [22] [D]<br>$D_{MAX} < 2 \text{ Gy}$ [80,122] [A]                                                                                                                                                    |
| Left Circumplex Coronary Artery (CxCA)       | $D_{MAX(0.03 \text{ cm}^3)} \leq 12 \text{ Gy}$ [24] [B]<br>$D_{MAX} \leq 14 \text{ Gy}$ [22] [D]                                                                                                                                  |
| Left Main Coronary artery (LMCA)             | $D_{MAX(0.03 \text{ cm}^3)} \leq 12 \text{ Gy}$ [24] [B]<br>$D_{MAX} \leq 14 \text{ Gy}$ [22] [D]                                                                                                                                  |
| Liver                                        | $V_{9.1\text{Gy}} < 700 \text{ cm}^3$ ;<br>[6,8,21] [A]                                                                                                                                                                            |
| Lung                                         | $V_{20\text{Gy}} < 15\%$ (mandatory);<br>$D_{MEAN} < 8 \text{ Gy}$ (mandatory);<br>$V_{20\text{Gy}} < 10\%$ (optimal); [6] [A]<br>$V_{7\text{Gy}} < 1500 \text{ cm}^3$ ;<br>$V_{7.4\text{Gy}} < 1000 \text{ cm}^3$ ;<br>[8,21] [A] |
| Proximal Brochus                             | $D_{MAX(0.1 \text{ cm}^3)} \leq 20.2 \text{ Gy}$ [6] [A]<br>$V_{10.5\text{Gy}} < 4 \text{ cm}^3$ ;<br>[8,21] [A]                                                                                                                   |
| Right Coronary Artery(RCA)                   | $D_{MAX(0.03 \text{ cm}^3)} \leq 12 \text{ Gy}$ [24] [B]                                                                                                                                                                           |
| Skin                                         | $D_{MAX(0.01 \text{ cm}^3)} < 26 \text{ Gy}$ (mandatory);<br>$D_{10\text{cm}^3} < 23 \text{ Gy}$ (mandatory) [6,8] [A]                                                                                                             |
| SpinalCord                                   | $D_{MAX(0.035 \text{ cm}^3)} < 14 \text{ Gy}$ (mandatory);<br>$D_{MAX(0.035 \text{ cm}^3)} < 12.4 \text{ Gy}$ (optimal) [6] [A]<br>$V_{7\text{Gy}} < 1.2 \text{ cm}^3$ ;                                                           |

|                    |                                                                                                                         |
|--------------------|-------------------------------------------------------------------------------------------------------------------------|
|                    | $V_{10Gy} < 0.35 \text{ cm}^3$ ;<br>[8,21] [A]                                                                          |
| Stomach            | $D_{MAX(0.1 \text{ cm}^3)} < 12.4 \text{ Gy}$ (mandatory);<br>$D_{10\text{cm}^3} < 11.2 \text{ Gy}$ (optimal) [6,8] [A] |
| Superior Vena cava | $D_{MAX(0.1 \text{ cm}^3)} \leq 15.4 \text{ Gy}$ [6] [A];<br>$D_{50\%} \leq 0.6 \text{ Gy}$ [22] [D]                    |
| Trachea            | $D_{MAX} \leq 20.2 \text{ Gy}$ ;<br>$V_{10.5Gy} < 4 \text{ cm}^3$ ; [8,21] [A]                                          |

**Legend:** CxCA: Left Circumplex Coronary Artery; DMax: Maximum Dose; Gy: Gray; ICD: implantable cardioverter defibrillator; A\_LAD: Left Anterior Descending Coronary Artery; LMCA: Left Main Coronary artery; RCA: Right Coronary Artery; PTV: Planning Target Volume. The anatomical descriptions are reported in Table 2. Common abbreviations were used in the tables:  $V_{\odot}$  = Volume receiving a dose  $\geq \odot$  Gy,  $D_{\odot\odot}$  = dose received by % of the organ volume,  $D_{\odot}$  = dose received by  $\gamma$  cm<sup>3</sup> (the cubic centimeters) of the organ volume, DMAX = maximum dose received by the organ, DMEAN = mean dose received by the organ. Volumes and doses were ex-pressed as percentage (%) or absolute values (cm<sup>3</sup> or Gy, respectively). The letters in square brackets indicate the levels of evidence, classified as follows: [A] International guidelines; [B] literature review on clinical or planning studies; [C] Data from results of clinical or planning studies; [D] expert opinions or used in prospective trials. \* Please consider anatomical description reported in **Table1 or 2**. **Note:** other cardiac substructures (Pulmonary trunk, right and left pulmonary veins, right and left ventricles, right atrium, inferior vena cava, phrenic nerve) may be delineated for dosimetric purposes.
